# Supplementary material for: A survey of dioxin-like contaminants in fish from recreational fishing
Source: Springer Nature journal article supplement (doi:10.1007/s10661-015-4728-7), 2015-07-18
Supplement: MOESM1 [file 10661_2015_4728_MOESM1_ESM.docx]

**Supplementary materials**

## A survey of dioxin-like chemicals in fish from recreational fishing

Eldbjørg Sofie Heimstad1[[1]](#footnote-1)*, Gaute Grønstøl2, Karl Torstein Hetland3, Javier Martinez Alarcon4, Charlotta Rylander1,5 and Espen Mariussen4,6

1. NILU (Norwegian Institute for Air Research) FRAM - High North Research Centre for Climate and the Environment, NO-9296 Tromsø
2. Centre of Schools’ Science Education, University of Bergen, Allégaten 41, NO-5007 Bergen
3. Norwegian Centre for Science Education, P.O. Box 1099, Blindern, NO-0317 Oslo
4. NILU (Norwegian Institute for Air Research) P.O. Box 100, NO-2027 Kjeller
5. Institute of Community Medicine, University of Tromsø, 9037 Tromsø
6. FFI (Norwegian Defence Research Establishment) P.O. Box 25, NO-2027 Kjeller

Table 1S) Details about the fish samples received for analysis for the content of dioxin- and dioxin like chemicals with the CALUX bioassay.

| **Country** | **School** | **Species** | **English name** | **Area of catch** | **Lattitude** | **Longitude** | **Weight (g)** | **Length (cm)** | **Lipd (%)** | **pg/g w. w.** | **pg/g l. w.** |
| --- | --- | --- | --- | --- | --- | --- | --- | --- | --- | --- | --- |
| Norway | St.Olav vgs 32Bi | Gadus morhua | Cod | Sørskår, Ardalsfjoed | 59.1322222 | 6.089722222 | 248 | 299 | 0.57 % | 0.15 | 26 |
| Norway | St.Olav vgs 32Bi | Gadus morhua | Cod | Sørskår, Ardalsfjoed | 59.1322222 | 6.089722222 | 289 | 300 | 0.57 % | 0.10 | 18 |
| Norway | St.Olav vgs 32Bi | Gadus morhua | Cod | Sørskår, Ardalsfjoed | 59.1322222 | 6.089722222 | 276 | 305 | 0.44 % | 0.27 | 60 |
| Norway | St.Olav vgs | Gadus morhua | Cod | Sørskår, Ardalsfjoed | 59.1322222 | 6.089722222 |  |  | 0.49 % | 0.31 | 63 |
| Norway | St.Olav vgs | Gadus morhua | Cod | Sørskår, Ardalsfjoed | 59.1322222 | 6.089722222 |  |  | 0.43 % | 0.44 | 102 |
| Norway | St.Olav vgs | Gadus morhua | Cod | Sørskår, Ardalsfjoed | 59.1322222 | 6.089722222 |  |  | 0.51 % | 0.65 | 127 |
| Norway | Hetland vgs | Gadus morhua | Cod | Lundsvågen | 59.003157 | 5.748325939 | 104 | 490 | 0.43 % | 0.11 | 25 |
| Norway | Hetland vgs | Gadus morhua | Cod | Lundsvågen | 59.003157 | 5.748325939 | 310 | 340 | 0.58 % | 0.18 | 31 |
| Norway | Presterød | Gadus morhua | Cod | Karlsvikodden | 59.295117 | 10.51869674 | 926 | 470 | 0.48 % | 0.11 | 23 |
| Norway | Indre troms vgs | Gadus morhua | Cod | Sjøvegan | 68.881941 | 17.78196926 | 590 | 450 | 0.35 % | 0.07 | 20 |
| Norway | Indre troms vgs | Gadus morhua | Cod | Sjøvegan | 68.881941 | 17.78196926 | 630 | 424 | 0.51 % | 0.20 | 39 |
| Norway | Indre troms vgs | Gadus morhua | Cod | Sjøvegan | 68.881941 | 17.78196926 | 590 | 450 | 0.29 % | 0.16 | 55 |
| Norway | Ørsnes privatskole | Gadus morhua | Cod | Vågan | 68.2202778 | 14.5075 |  |  | 0.42 % | 0.20 | 48 |
| Norway | Ørsnes privatskole | Gadus morhua | Cod | Vågan | 68.2202778 | 14.5075 |  |  | 0.45 % | 0.11 | 24 |
| Norway | Ørsnes privatskole | Gadus morhua | Cod | Vågan | 68.2202778 | 14.5075 |  |  | 0.44 % | 0.22 | 50 |
| Norway | Sande skole | Gadus morhua | Cod | Dalsfjorden | 61.470422 | 7.558381562 | 1127 | 450 | 0.34 % | 0.36 | 105 |
| Norway | Sande skole | Gadus morhua | Cod | Dalsfjorden | 61.470422 | 7.558381562 | 4100 | 640 | 0.41 % | 0.29 | 71 |
| Norway | Sande skole | Gadus morhua | Cod | Dalsfjorden | 61.470422 | 7.558381562 | 3040 | 610 | 0.56 % | 0.45 | 80 |
| Norway | Stangæland usk | Gadus morhua | Cod | Karmøy | 59.268615 | 5.251717709 |  |  | 0.44 % | 0.23 | 53 |
| Norway | Eiksmarka sk. | Gadus morhua | Cod | Langåra i Asker | 59.852537 | 10.54036658 |  |  | 0.43 % | 0.39 | 91 |
| Norway | Eiksmarka sk. | Gadus morhua | Cod | Langåra i Asker | 59.852537 | 10.54036658 |  |  | 0.43 % | 0.58 | 134 |
| Norway | Eiksmarka sk. | Gadus morhua | Cod | Langåra i Asker | 59.852537 | 10.54036658 |  |  | 0.50 % | 0.24 | 47 |
| Norway | Berg vgs | Gadus morhua | Cod | Langåra i Asker | 59.852537 | 10.54036658 | 839 | 435 | 0.51 % | 0.36 | 71 |
| Norway | Berg vgs | Gadus morhua | Cod | Langåra i Asker | 59.852537 | 10.54036658 | 898 | 450 | 0.51 % | 0.44 | 86 |
| Norway | Berg vgs | Gadus morhua | Cod | Langåra i Asker | 59.852537 | 10.54036658 | 450 | 694 | 0.50 % | 0.57 | 114 |
| Norway | Vannareid opp.1 | Gadus morhua | Cod | Vannareid | 70.203375 | 19.59128592 | 6500 | 750 | 0.28 % | 0.18 | 64 |
| Norway | Vannareid opp.2 | Gadus morhua | Cod | Vannareid | 70.203375 | 19.59128592 | 6000 | 780 | 0.38 % | 0.12 | 31 |
| Norway | Vannareid opp.3 | Gadus morhua | Cod | Vannareid | 70.203375 | 19.59128592 | 4000 | 780 | 0.44 % | 0.28 | 64 |
| Norway | Bodø vgs.torsk1 | Gadus morhua | Cod | Karlsøyfjorden | 67.5608333 | 14.84222222 | 1965 | 575 | 0.32 % | 0.14 | 44 |
| Norway | Bodø vgs.torsk2 | Gadus morhua | Cod | Karlsøyfjorden | 67.5608333 | 14.84222222 | 1969 | 575 | 0.48 % | 0.12 | 26 |
| Norway | Bodø vgs.torsk3 | Gadus morhua | Cod | Karlsøyfjorden | 67.5608333 | 14.84222222 | 1765 | 560 | 0.37 % | 0.10 | 26 |
| Norway | Bodø vgs.torsk4 | Gadus morhua | Cod | Karlsøyfjorden | 67.5608333 | 14.84222222 | 2020 | 575 | 0.30 % | 0.15 | 52 |
| Norway | Bodø vgs.torsk5 | Gadus morhua | Cod | Karlsøyfjorden | 67.5608333 | 14.84222222 | 1761 | 570 | 0.42 % | 0.17 | 39 |
| Norway | Risør ungsk.torsk1 | Gadus morhua | Cod | Risør | 58.718317 | 9.283801646 | 518 | 366 | 0.49 % | 0.13 | 27 |
| Norway | Risør ungsk.torsk2 | Gadus morhua | Cod | Risør | 58.718317 | 9.283801646 | 349 | 330 | 0.45 % | 0.21 | 48 |
| Norway | Risør ungsk.torsk3 | Gadus morhua | Cod | Risør | 58.718317 | 9.283801646 | 524 | 359 | 0.24 % | 0.22 | 93 |
| Norway | Steinkjer mskole 1 | Gadus morhua | Cod | Steinkjer | 63.993938 | 11.31153904 | 436 |  | 0.33 % | 0.19 | 56 |
| Norway | Steinkjer mskole 2 | Gadus morhua | Cod | Steinkjer | 63.993938 | 11.31153904 | 607 | 370 | 0.38 % | 0.55 | 146 |
| Norway | Steinkjer mskole 3 | Gadus morhua | Cod | Steinkjer | 63.993938 | 11.31153904 | 337 | 405 | 0.20 % | 0.26 | 130 |
| Norway | Samfundets skole | Gadus morhua | Cod | Egersund havn | 58.420782 | 6.016781615 |  |  | 0.58 % | 0.27 | 47 |
| Norway | Samfundets skole | Gadus morhua | Cod | Egersund havn | 58.420782 | 6.016781615 |  |  | 0.30 % | 0.40 | 133 |
| Norway | Nordkapp fagskole | Gadus morhua | Cod | Barents, Kjøllefjord | 71.152222 | 9.45472189 | 1285 | 555 | 0.15 % | 0.09 | 63 |
| Norway | Nordkapp fagskole | Gadus morhua | Cod | Barents, Kjøllefjord | 71.152222 | 9.45472189 | 1245 | 525 | 0.31 % | 0.09 | 29 |
| Norway | Nordkapp fagskole | Gadus morhua | Cod | Barents, Kjøllefjord | 71.152222 | 9.45472189 | 1875 | 615 | 0.36 % | 0.07 | 20 |
| Norway | Sunnylven skole | Gadus morhua | Cod | Korsbrekkeosen | 62.082154 | 6.875720597 | 2200 | 615 | 0.55 % | 0.58 | 105 |
| Norway | Brevik skole | Gadus morhua | Cod | Store Brevik, Oslofjorden | 59.505058 | 10.67980521 | 1540 | 550 | 0.42 % | 0.63 | 151 |
| Norway | Brevik skole | Gadus morhua | Cod | Store Brevik, Oslofjorden | 59.505058 | 10.67980521 | 1250 | 524 | 0.50 % | 0.11 | 22 |
| Norway | Brevik skole | Gadus morhua | Cod | Store Brevik, Oslofjorden | 59.505058 | 10.67980521 | 520 | 400 | 0.21 % | 0.38 | 182 |
| Norway | Sjøvegan vdg skole | Gadus morhua | Cod | Fjæra på Sjøvegan | 68.8722222 | 17.84194444 | 590 | 450 | 0.29 % | 0.16 | 55 |
| Norway | Sjøvegan vdg skole | Gadus morhua | Cod | Fjæra på Sjøvegan | 68.8722222 | 17.84194444 | 630 | 424 | 0.51 % | 0.20 | 39 |
| Norway | Sjøvegan vdg skole | Gadus morhua | Cod | Fjæra på Sjøvegan | 68.8722222 | 17.84194444 | 590 | 450 | 0.26 % | 0.07 | 27 |
| Norway | Sjøvegan vdg skole | Gadus morhua | Cod | Astafjorden | 68.8488889 | 17.53944444 | 3274 | 66 | 0.54 % | 0.18 | 33 |
| Norway | Bodø vgs | Pollachius virens | Pollock | Karlsøyfjorden | 67.5608333 | 14.84222222 | 1250 | 580 | 0.99 % | 0.14 | 14 |
| Norway | Bodø vgs | Pollachius virens | Pollock | Karlsøyfjorden | 67.5608333 | 14.84222222 | 1350 | 600 | 0.73 % | 0.07 | 10 |
| Norway | Bodø vgs | Pollachius virens | Pollock | Karlsøyfjorden | 67.5608333 | 14.84222222 | 1668 | 123 | 0.85 % | 0.099 | 12 |
| Norway | Bodø vgs | Pollachius virens | Pollock | Karlsøyfjorden | 67.5608333 | 14.84222222 | 1830 | 123 | 1.10 % | 0.25 | 23 |
| Norway | Bodø vgs | Pollachius virens | Pollock | Karlsøyfjorden | 67.5608333 | 14.84222222 |  |  | 0.69 % | 0.11 | 15 |
| Norway | Bodø vgs | Pollachius virens | Pollock | Karlsøyfjorden | 67.5608333 | 14.84222222 |  |  | 0.76 % | 0.3 | 39 |
| Norway | Hetland vgs | Pollachius pollachius | Pollock | Lundsvågen | 59.003157 | 5.748325939 | 1770 | 630 | 0.49 % | 0.39 | 80 |
| Norway | Stangæland usk | Pollachius pollachius | Pollock | Karmøy | 59.268615 | 5.251717709 |  |  | 0.59 % | 0.11 | 19 |
| Norway | Molde vgs | Pollachius pollachius | Pollock | Fannefjorden | 62.734444 | 7.283878367 | 3360 | 690 | 0.39 % | 0.22 | 57 |
| Norway | Molde vgs | Pollachius virens | Pollock | Fannefjorden | 62.734444 | 7.283878367 | 1933 | 650 | 0.41 % | 0.54 | 131 |
| Norway | Molde vgs | Pollachius pollachius | Pollock | Fannefjorden | 62.734444 | 7.283878367 | 2768 | 720 | 0.47 % | 0.53 | 113 |
| Norway | Vardafjell vgs | Pollachius pollachius | Pollock | Jarstein | 59.149442 | 5.162260466 | 627 | 428 | 0.21 % | 0.11 | 52 |
| Norway | Vardafjell vgs | Pollachius pollachius | Pollock | Jarstein | 59.149442 | 5.162260466 | 743 | 435 | 0.26 % | 0.12 | 44 |
| Norway | Vardafjell vgs | Pollachius pollachius | Pollock | Jarstein | 59.149442 | 5.162260466 | 1030 | 470 | 0.38 % | 0.15 | 41 |
| Norway | Samfundets skole | Pollachius virens | Pollock | Egersund havn | 58.448652 | 5.985050973 | 264 | 320 | 0.49 % | 0.16 | 32 |
| Norway | Bodø vgs.sei 1 | Pollachius virens | Pollock | Karlsøyfjorden | 67.5608333 | 14.84222222 | 1250 | 380 | 0.36 % | 0.13 | 36 |
| Norway | Bodø vgs.sei 2 | Pollachius virens | Pollock | Karlsøyfjorden | 67.5608333 | 14.84222222 | 1350 | 600 | 0.37 % | 0.18 | 48 |
| Norway | Bodø vgs.sei 3 | Pollachius virens | Pollock | Karlsøyfjorden | 67.5608333 | 14.84222222 | 1668 | 1235 | 0.52 % | 0.20 | 39 |
| Norway | Bodø vgs.sei 4 | Pollachius virens | Pollock | Karlsøyfjorden | 67.5608333 | 14.84222222 | 1830 | 1235 | 0.32 % | 0.11 | 36 |
| Norway | Brevik skole | Pollachius pollachius | Pollock | Store Brevik , Oslofjorden | 59.505058 | 10.67980521 | 870 | 450 | 0.48 % | 0.07 | 15 |
| Norway | Brevik skole | Pollachius pollachius | Pollock | Store Brevik , Oslofjorden | 59.505058 | 10.67980521 | 564 | 400 | 0.38 % | 0.07 | 18 |
| Norway | Brevik skole | Pollachius pollachius | Pollock | Store Brevik , Oslofjorden | 59.505058 | 10.67980521 | 182 | 290 | 0.64 % | 0.07 | 11 |
| Norway | Indre troms vgs | Pollachius virens | Pollock | Boknafjorden v/ Fjøløy | 59.12724 | 5.37544 |  |  | 0.47 % | 0.15 | 31 |
| Norway | Orstad sk. Norge | Pollachius virens | Pollock | Boknafjorden v/ Fjøløy | 59.12724 | 5.37544 | 750 | 450 | 0.92 % | 0.32 | 35 |
| Norway | Orstad sk. Norge | Pollachius virens | Pollock | Boknafjorden v/ Fjøløy | 59.12724 | 5.37544 | 1125 | 520 | 0.62 % | 0.31 | 50 |
| Norway | Orstad sk. Norge | Pollachius virens | Pollock | Boknafjorden v/ Fjøløy | 59.12724 | 5.37544 | 1000 | 390 | 0.54 % | 0.20 | 36 |
| Norway | Sjøvegan vdg skole | Pollachius virens | Pollock | Astafjorden | 68.8488889 | 17.53944444 | 2642 | 686 | 0.47 % | 0.15 | 32 |
| Norway | Atrå b-ung | Salmo trutta | Brown trout | Tinnsjøen nord | 59.985083 | 8.776946348 | 300 | 300 | 1.28 % | 0.24 | 19 |
| Norway | Atrå b-ung | Salmo trutta | Brown trout | Tinnsjøen nord | 59.985083 | 8.776946348 | 233 | 370 | 2.30 % | 0.60 | 26 |
| Norway | Snåsa ung.1 | Salmo trutta | Brown trout | Snåsavatnet | 64.1866 | 12.00822306 | 390 | 340 | 0.93 % | 0.22 | 24 |
| Norway | Snåsa ung.2 | Salmo trutta | Brown trout | Snåsavatnet | 64.1866 | 12.00822306 | 402 | 360 | 0.63 % | 0.17 | 27 |
| Norway | Snåsa ung.3 | Salmo trutta | Brown trout | Snåsavatnet | 64.1866 | 12.00822306 | 365 | 335 | 1.50 % | 0.37 | 25 |
| Norway | Nord østerdal vgs | Salmo trutta | Brown trout | Bjørntjønnan | 62.508196 | 10.69997385 | 107 | 227 | 1.89 % | 0.20 | 10 |
| Norway | Nord østerdal vgs | Salmo trutta | Brown trout | Bjørntjønnan | 62.508196 | 10.69997385 | 106 | 254 | 1.33 % | 0.17 | 13 |
| Norway | Nord østerdal vgs | Salmo trutta | Brown trout | Bjørsjøen | 62.508196 | 10.69997385 | 211 | 255 | 0.54 % | 0.27 | 51 |
| Norway | Tromsdalen vgs | Salmo trutta | Brown trout | Fjellfrøsvatnet | 69.085 | 19.33861111 | 136 | 260 | 0.21 % | 0.09 | 44 |
| Norway | Tromsdalen vgs | Salmo trutta | Brown trout | Fjellfrøsvatnet | 69.085 | 19.33861111 | 136 | 228 | 0.84 % | 0.11 | 13 |
| Norway | Tromsdalen vgs | Salmo trutta | Brown trout | Fjellfrøsvatnet | 69.085 | 19.33861111 | 278 | 294 | 0.65 % | 0.42 | 65 |
| Liechtenstein | Liechtenstein gy. | Salmo trutta | Brown trout | Neugut Triesen | 47.125276 | 9.519989984 | 595 | 345 | 2.37 % | 0.28 | 12 |
| Liechtenstein | Liechtenstein gy. | Salmo trutta | Brown trout | Neugut Triesen | 47.125276 | 9.519989984 | 325 | 316 | 0.83 % | 0.20 | 24 |
| Liechtenstein | Liechtenstein gy. | Salmo trutta | Brown trout | Neugut Triesen | 47.125276 | 9.519989984 | 252 | 260 | 6.14 % | 0.82 | 13 |
| Norway | Høydalsmosk.1 | Salmo trutta | Brown trout | Oftevatn | 59.49097 | 8.204999647 | 507 | 365 | 1.04 % | 0.53 | 51 |
| Norway | Høydalsmosk.2 | Salmo trutta | Brown trout | Oftevatn | 59.49097 | 8.204999647 | 415 | 350 | 1.51 % | 0.65 | 43 |
| Norway | Høydalsmosk.3 | Salmo trutta | Brown trout | Oftevatn | 59.49097 | 8.204999647 | 717 | 420 | 1.12 % | 0.52 | 46 |
| Norway | Samfundets skole | Salmo trutta trutta | Brown trout | Egersund havn | 58.420782 | 6.016781615 | 580 | 420 | 0.46 % | 0.53 | 116 |
| Norway | Samfundets skole | Salmo trutta trutta | Brown trout | Egersund havn | 58.420782 | 6.016781615 | 200 | 295 | 0.38 % | 0.53 | 140 |
| Norway | Samfundets skole | Salmo trutta trutta | Brown trout | Egersund havn | 58.420782 | 6.016781615 | 568 | 410 | 0.85 % | 0.33 | 39 |
| Norway | Sunnylven skole | Salmo trutta | Brown trout | Helsevatnet | 62.055877 | 6.949309533 | 145 | 260 | 0.75 % | 0.23 | 31 |
| Norway | Sunnylven skole | Salmo trutta | Brown trout | Helsevatnet | 62.055877 | 6.949309533 | 100 | 220 | 0.61 % | 0.38 | 62 |
| Norway | Apeltun sk.Igl1 | Salmo trutta | Brown trout | Iglevatn | 60.148592 | 5.419003046 | 138 | 230 | 0.95 % | 0.26 | 28 |
| Norway | Apeltun sk.Igl2 | Salmo trutta | Brown trout | Iglevatn | 60.148592 | 5.419003046 | 70 | 200 | 0.53 % | 0.18 | 33 |
| Norway | Apeltun sk.Igl3 | Salmo trutta | Brown trout | Iglevatn | 60.148592 | 5.419003046 | 440 | 160 | 0.72 % | 0.46 | 64 |
| Norway | Apeltun sk.Igl3 | Salmo trutta | Brown trout | Apeltunvatn | 60.298135 | 5.333854802 | 204 | 280 | 0.85 % | 0.22 | 26 |
| Norway | Apeltun sk.Igl3 | Salmo trutta | Brown trout | Apeltunvatn | 60.298135 | 5.333854802 | 200 | 272 | 0.75 % | 0.49 | 65 |
| Norway | Apeltun sk.Igl3 | Salmo trutta | Brown trout | Apeltunvatn | 60.298135 | 5.333854802 | 184 | 270 | 0.81 % | 0.49 | 60 |
| Norway | Vest telemark skole | Salmo trutta | Brown trout | Bandak? | 59.445935 | 7.987033 |  |  | 0.55 % | 0.48 | 87 |
| Norway | Vest telemark skole | Salmo trutta | Brown trout | Bandak? | 59.445935 | 7.987033 |  |  | 0.59 % | 0.10 | 17 |
| Norway | Vest telemark skole | Salmo trutta | Brown trout | Bandak? | 59.445935 | 7.987033 |  |  | 0.30 % | 0.10 | 33 |
| Estonia | Rakke gymnasium | Perca fluviatilis | European perch | Rakke | 58.987341 | 26.24381 |  |  | 0.86 % | 0.34 | 40 |
| Estonia | Rakke gymnasium | Perca fluviatilis | European perch | Rakke | 58.987341 | 26.24381 |  |  | 0.47 % | 0.10 | 21 |
| Estonia | Rakke gymnasium | Perca fluviatilis | European perch | Rakke | 58.987341 | 26.24381 |  |  | 0.39 % | 0.12 | 32 |
| Estonia | Rakke gymnasium | Perca fluviatilis | European perch | Rakke | 58.987341 | 26.24381 |  |  | 0.44 % | 0.16 | 37 |
| Finland | Vasa gymnasiet | Perca fluviatilis | European perch | Vaasa | 63.09469 | 21.610311 |  |  | 0.18 % | 0.10 | 55 |
| Finland | Vasa gymnasiet | Perca fluviatilis | European perch | Vaasa | 63.09469 | 21.610311 |  |  | 0.59 % | 0.43 | 73 |
| Finland | Vasa gymnasiet | Perca fluviatilis | European perch | Vaasa | 63.09469 | 21.610311 |  |  | 0.69 % | 0.38 | 54 |
| Norway | Holmen skole 1 | Perca fluviatilis | European perch | Snipetjern | 59.804366 | 10.83674639 | 46 | 170 | 0.24 % | 0.21 | 89 |
| Norway | Holmen skole 6 | Perca fluviatilis | European perch | Snipetjern | 59.804366 | 10.83674639 | 78 | 195 | 0.35 % | 0.15 | 42 |
| Norway | Holmen skole 7 | Perca fluviatilis | European perch | Snipetjern | 59.804366 | 10.83674639 | 86 | 185 | 0.35 % | 0.30 | 85 |
| Norway | Holmen skole 8 | Perca fluviatilis | European perch | Snipetjern | 59.804366 | 10.83674639 | 137 | 225 | 0.52 % | 0.16 | 30 |
| Norway | Holmen skole 12 | Perca fluviatilis | European perch | Snipetjern | 59.804366 | 10.83674639 | 86 | 197 | 0.52 % | 0.14 | 27 |
| Norway | Løkeberg skole | Perca fluviatilis | European perch | Dælivannet (?) | 59.909719 | 10.544300 |  |  | 0.65 % | 0.20 | 31 |
| Estonia | Tori basic scchol | Perca fluviatilis | European perch | Pärnu jõgi | 58.3555556 | 24.5925 | 50 | 130 | 1.66 % | 0.54 | 32 |
| Norway | Vestlofoten | Salvelinus alpinus | Arctic char | Storvatnet | 68.0930556 | 13.53222222 | 308 | 355 | 1.77 % | 0.36 | 20 |
| Norway | Vestlofoten | Salvelinus alpinus | Arctic char | Storvatnet | 68.0930556 | 13.53222222 | 290 | 305 | 0.86 % | 0.16 | 19 |
| Norway | Vestlofoten | Salvelinus alpinus | Arctic char | Storvatnet | 68.0930556 | 13.53222222 | 289 | 310 | 1.96 % | 0.38 | 20 |
| Norway | Atrå b-ung | Salvelinus alpinus | Arctic char | Tinnsjøen nord | 59.985083 | 8.776946348 | 256 | 295 | 1.55 % | 0.81 | 52 |
| Norway | Atrå b-ung | Salvelinus alpinus | Arctic char | Tinnsjøen nord | 59.985083 | 8.776946348 | 260 | 300 | 1.30 % | 0.57 | 44 |
| Norway | Atrå b-ung | Salvelinus alpinus | Arctic char | Tinnsjøen nord | 59.985083 | 8.776946348 | 248 | 280 | 2.09 % | 0.82 | 39 |
| Norway | Atrå b-ung | Salvelinus alpinus | Arctic char | Tinnsjøen nord | 59.985083 | 8.776946348 | 272 |  | 1.29 % | 0.71 | 55 |
| Iceland | Bláskógabyggðar, Laugarvatni | Salvelinus alpinus | Arctic char | Laugarvatn | 64.206388 | -20.60750008 | 1000 | 450 | 0.48 % | 0.17 | 36 |
| Iceland | Bláskógabyggðar, Laugarvatni | Salvelinus alpinus | Arctic char | Laugarvatn | 64.206388 | -20.60750008 | 800 | 900 | 0.40 % | 0.10 | 26 |
| Iceland | Bláskógabyggðar, Laugarvatni | Salvelinus alpinus | Arctic char | Laugarvatn | 64.206388 | -20.60750008 | 800 | 430 | 0.55 % | 0.79 | 144 |
| Croatia | Daruvar skola | Cyprinus carpio | Common carp | Daruvar | 45.5986111 | 17.19333333 | 1890 | 490 | 3.45 % | 0.46 | 13 |
| Croatia | Daruvar skola | Cyprinus carpio | Common carp | Daruvar | 45.5986111 | 17.19333333 | 1420 | 450 | 5.28 % | 0.35 | 7 |
| Croatia | Daruvar skola | Cyprinus carpio | Common carp | Daruvar | 45.5986111 | 17.19333333 | 1590 | 450 | 1.16 % | 0.17 | 15 |
| Czech Rep. | Svitavy sokolovsk | Cyprinus carpio | Common carp | Svitavy | 49.77 | 16.45083333 | 1337 | 380 | 1.36 % | 0.28 | 21 |
| Czech Rep. | Svitavy sokolovsk | Cyprinus carpio | Common carp | Svitavy | 49.77 | 16.45083333 | 1267 | 370 | 1.36 % | 0.28 | 21 |
| Czech Rep. | Svitavy sokolovsk | Cyprinus carpio | Common carp | Svitavy | 49.77 | 16.45083333 | 1449 | 400 | 1.02 % | 1.06 | 104 |
| Estonia | Viljandi.gymn.est.1 | Esox lucius | Pike | Peipsi lake | 58.7111111 | 27.24583333 | 603 | 450 | 0.20 % | 0.46 | 229 |
| Estonia | Viljandi.gymn.est.2 | Esox lucius | Pike | Peipsi lake | 58.7111111 | 27.24583333 | 669 | 470 | 0.35 % | 0.23 | 65 |
| Estonia | Viljandi.gymn.est.3 | Esox lucius | Pike | Peipsi lake | 58.7111111 | 27.24583333 | 680 | 470 | 0.38 % | 0.19 | 51 |
| Latvia | Livani school | Esox lucius | Pike | Daugava (?) | 56.3577778 | 26.17222222 | 1280 | 500 | 0.28 % | 0.61 | 217 |
| Latvia | Livani school | Esox lucius | Pike | Daugava (?) | 56.3577778 | 26.17222222 | 1100 | 450 | 0.31 % | 0.96 | 311 |
| Norway | Tæruddalen | Esox lucius | Pike | Nitelva (?) | 60.014066 | 11.015826 |  |  | 0.43 % | 0.27 | 62 |
| Denmark | Mulernes legatsk. | Platichtys flesus | Flounder | Odense | 55.455209 | 10.452165 |  |  | 0.59 % | 0.63 | 107 |
| Denmark | Mulernes legatsk | Platichtys flesus | Flounder | Odense | 55.455209 | 10.452165 |  |  | 0.54 % | 0.29 | 54 |
| Denmark | Mulernes legatsk | Platichtys flesus | Flounder | Odense | 55.455209 | 10.452165 |  |  | 0.55 % | 0.31 | 57 |
| Denmark | Mulernes legatsk | Platichtys flesus | Flounder | Odense | 55.455209 | 10.452165 |  |  | 0.58 % | 0.29 | 50 |
| Denmark | Mulernes legatsk | Platichtys flesus | Flounder | Odense | 55.455209 | 10.452165 |  |  | 1.81 % | 1.09 | 60 |
| Denmark | Mulernes legatsk | Platichtys flesus | Flounder | Odense | 55.455209 | 10.452165 |  |  | 0.86 % | 0.27 | 32 |
| Norway | Stangæland usk | Scomber scombrus | Atlantic mackerel | Karmøy | 59.268615 | 5.251717709 |  |  | 0.89 % | 0.67 | 75 |
| France | Andre Lahaye college | Scomber scombrus | Atlantic mackerel | Bay of Biscaya? | 44.5788889 | -1.090277778 | 245 | 320 | 0.56 % | 0.18 | 32 |
| France | Andre Lahaye college | Scomber scombrus | Atlantic mackerel | Bay of Biscaya? | 44.5788889 | -1.090277778 | 212 | 300 | 2.16 % | 1.73 | 80 |
| France | Andre Lahaye college | Scomber scombrus | Atlantic mackerel | Bay of Biscaya? | 44.5788889 | -1.090277778 | 256 | 310 | 1.38 % | 0.83 | 60 |
| France | Andre Lahaye college | Scomber scombrus | Atlantic mackerel | Bay of Biscaya? | 44.5788889 | -1.090277778 | 199 | 295 | 2.15 % | 0.94 | 44 |
| Norway | Orstad sk. Norge | Melanogrammus aeglefinus | Haddock | Boknafjorden v/ Fjøløy | 59.12724 | 5.37544 | 1350 | 520 | 0.56 % | 0.06 | 12 |
| Norway | Orstad sk. Norge | Melanogrammus aeglefinus | Haddock | Boknafjorden v/ Fjøløy | 59.12724 | 5.37544 | 750 | 435 | 0.19 % | 0.37 | 192 |
| Norway | Orstad sk. Norge | Melanogrammus aeglefinus | Haddock | Boknafjorden v/ Fjøløy | 59.12724 | 5.37544 | 400 | 414 | 0.27 % | 0.14 | 51 |
| Norway | Molde vgs | Melanogrammus aeglefinus | Haddock | Fannefjorden | 62.734444 | 7.283878367 | 2139 | 590 | 0.26 % | 1.08 | 416 |
| Norway | Molde vgs | Melanogrammus aeglefinus | Haddock | Fannefjorden | 62.734444 | 7.283878367 | 1585 | 525 | 0.23 % | 0.43 | 186 |
| Czech Rep. | Domecek cz.rep | Leuciscus cephalus | Fat chub | Valasske Mezirici | 49.4680556 | 17.97333333 | 141 | 242 | 0.91 % | 0.57 | 63 |
| Czech Rep. | Domecek cz.rep | Leuciscus cephalus | Fat chub | Valasske Mezirici | 49.4680556 | 17.97333333 | 181 | 260 | 0.81 % | 0.33 | 41 |
| Czech Rep. | Domecek cz.rep | Leuciscus cephalus | Fat chub | Valasske Mezirici | 49.4680556 | 17.97333333 | 125 | 231 | 2.16 % | 1.42 | 66 |
| Estonia | Tori basic scchol | Leuciscus cephalus | Fat chub | Pärnu jõgi | 58.3555556 | 24.5925 | 1620 | 430 | 0.76 % | 0.13 | 17 |
| Norway | Brevik skole | Clupea harengus | Herring | Store Brevik, Oslofjorden | 59.505058 | 10.67980521 | 146 | 280 | 2.11 % | 0.36 | 17 |
| Norway | Brevik skole | Clupea harengus | Herring | Store Brevik, Oslofjorden | 59.505058 | 10.67980521 | 183 | 290 | 2.25 % | 2.93 | 130 |
| Norway | Brevik skole | Clupea harengus | Herring | Store Brevik, Oslofjorden | 59.505058 | 10.67980521 |  |  | 2.20 % | 2.26 | 103 |
| Norway | Brevik skole | Clupea harengus | Herring | Store Brevik, Oslofjorden | 59.505058 | 10.67980521 |  |  | 2.32 % | 2.17 | 94 |
| France | Andre Lahaye college | Mugil cephalus | Flathead mullet | Bay of Biscaya? | 44.5788889 | -1.090277778 | 1135 | 480 | 0.20 % | 0.42 | 211 |
| France | Andre Lahaye college | Mugil cephalus | Flathead mullet | Bay of Biscaya? | 44.5788889 | -1.090277778 | 1360 | 500 | 0.27 % | 0.22 | 80 |
| France | Andre Lahaye college | Mugil cephalus | Flathead mullet | Bay of Biscaya? | 44.5788889 | -1.090277778 | 980 | 400 | 0.39 % | 0.50 | 128 |
| France | Andre Lahaye college | Mugil cephalus | Flathead mullet | Bay of Biscaya? | 44.5788889 | -1.090277778 | 1422 | 480 | 0.22 % | 0.57 | 261 |
| France | Montesquieu-France | Trachinus draco | Greater weever | Bassin d'arcachon | 44.624441 | 1.227500471 | 140 | 370 | 0.35 % | 0.14 | 41 |
| France | Montesquieu-France | Trachinus draco | Greater weever | Bassin d'arcachon | 44.624441 | 1.227500471 | 215 | 330 | 0.52 % | 0.17 | 33 |
| France | Montesquieu-France | Trachinus draco | Greater weever | Bassin d'arcachon | 44.624441 | 1.227500471 | 171 | 298 | 0.41 % | 0.19 | 47 |
| France | Montesquieu-France | Trachinus draco | Greater weever | Bassin d'arcachon | 44.624441 | 1.227500471 | 140 | 370 | 0.40 % | 0.84 | 211 |
| France | Andre Lahaye college | Sparus aurata | Gilthead sea bream | Bay of Biscaya? | 44.5788889 | -1.090277778 | 333 | 293 | 0.14 % | 0.42 | 299 |
| France | Andre Lahaye college | Sparus aurata | Gilthead sea bream | Bay of Biscaya? | 44.5788889 | -1.090277778 |  |  | 0.10 % | 9.12 | 9123 |
| France | Andre Lahaye college | Sparus aurata | Gilthead sea bream | Bay of Biscaya? | 44.5788889 | -1.090277778 | 326 | 270 | 0.14 % | 0.52 | 373 |
| France | La chenaie | Sparus aurata | Gilthead sea bream | Bay of Biscaya? | 44.5788889 | -1.090277778 |  |  | 0.72 % | 1.39 | 194 |
| Poland | Gimnazjum nr.9 | Rutilus rutilus | Roach | Wislok River | 50.0405556 | 22.01611111 | 70 | 150 | 0.81 % | 0.29 | 36 |
| Norway | Løkeberg skole | Rutilus rutilus | Roach | Dælivannet (?) | 59.909719 | 10.544300 |  |  | 0.59 % | 0.11 | 19 |
| Latvia | Livani school | Perca fluviatilis | Perch | Daugava (?) | 56.3577778 | 26.17222222 |  |  | 0.36 % | 2.40 | 666 |
| Norway | Sigdal ungdomsk. | Coregonus lavaretus | Common whitefish | Frydheim (Simoa) | 60.083889 | 9.482778462 | 165 | 265 | 0.70 % | 0.36 | 51 |
| Norway | Sigdal ungdomsk | Coregonus lavaretus | Common whitefish | Frydheim (Simoa) | 60.083889 | 9.482778462 | 201 | 280 | 0.81 % | 0.63 | 78 |
| Norway | Sigdal ungdomsk | Coregonus lavaretus | Common whitefish | Frydheim (Simoa) | 60.083889 | 9.482778462 | 214 | 300 | 1.18 % | 0.68 | 57 |
| Estonia | Taaksi school | Lota lota | Burbot | Lake Võrtsjärv | 58.291904 | 26.034601 | 566 | 380 | 0.69 % | 0.20 | 29 |
| Estonia | Taaksi school | Lota lota | Burbot | Lake Võrtsjärv | 58.291904 | 26.034601 | 383 | 380 | 0.82 % | 0.29 | 35 |
| Estonia | Taaksi school | Lota lota | Burbot | Lake Võrtsjärv | 58.291904 | 26.034601 | 344 | 330 | 1.03 % | 0.19 | 18 |
| Norway | Samfundets skole | Limanda limanda | common dab | Egersund havn | 58.448652 | 5.985050973 | 372 | 310 | 0.59 % | 0.53 | 89 |
| Norway | Samfundets skole | Limanda limanda | common dab | Egersund havn | 58.448652 | 5.985050973 | 384 | 322 | 7.58 % | 7.38 | 97 |
| Norway | Samfundets skole | Limanda limanda | common dab | Egersund havn | 58.448652 | 5.985050973 | 352 | 330 | 6.06 % | 3.94 | 65 |
| Australia | Footscray city college | Acanthopagrus australis | Yellowfin bream | Maribyrnong River | -37.7908333 | 144.9019444 | 654 | 340 | 0.56 % | 0.50 | 89 |
| Australia | Footscray city college | Acanthopagrus australis | Yellowfin bream | Maribyrnong River | -37.7908333 | 144.9019444 |  |  | 0.30 % | 0.69 | 228 |
| Australia | Footscray city college | Acanthopagrus butcher | Southern black bream | Maribyrnong River | -37.7908333 | 144.9019444 | 419 | 290 | 0.36 % | 0.38 | 105 |
| Estonia | Tori basic scchol | Blicca bjoerkna | Silver bream | Pärnu jõgi | 58.3555556 | 24.5925 | 120 | 190 | 1.03 % | 1.29 | 126 |
| Norway | Bodø vgs | Sebastes marinus | Rose fish | Karlsøyfjorden | 67.5608333 | 14.84222222 |  |  | 4.98 % | 1.2 | 24 |
| Norway | Bodø vgs | Sebastes marinus | Rose fish | Karlsøyfjorden | 67.5608333 | 14.84222222 |  |  | 5.08 % | 1 | 20 |
| Norway | Molde vgs | Molva molva | Common ling | Fannefjorden | 62.734444 | 7.283878367 | 4291 | 850 | 0.37 % | 0.54 | 146 |
| Norway | Presterød | Pleuronectes platessa | European plaice | Karlsvikodden | 59.295117 | 10.51869674 | 555 | 370 | 0.77 % | 0.14 | 18 |

1. [↑](#footnote-ref-1)
